# Supplementary material for: The recurrence risk of neural tube defects (NTDs) in a population with high prevalence of NTDs in northern China
Source: PubMed Central journal article supplement (PMC5641153; doi:10.18632/oncotarget.19890), 2017-08-03
Supplement: oncotarget-08-72577-s001.pdf [file oncotarget-08-72577-s001.pdf]

## **The recurrence risk of neural tube defects (NTDs) in a population with high prevalence of NTDs in northern china**

### **SUPPLEMENTARY MATERIALS**

**Supplementary Table 1: Comparison the dietary frequency for the recurrent pregnancy of NTDs and healthy control.**

**See Supplementary File 1**
